# Supplementary material
Source: PubMed Central journal article supplement (PMC3322814)
Supplement: supp_M111.300319_jbc.M111.300319-1.pdf [file supp_M111.300319_jbc.M111.300319-1.pdf]

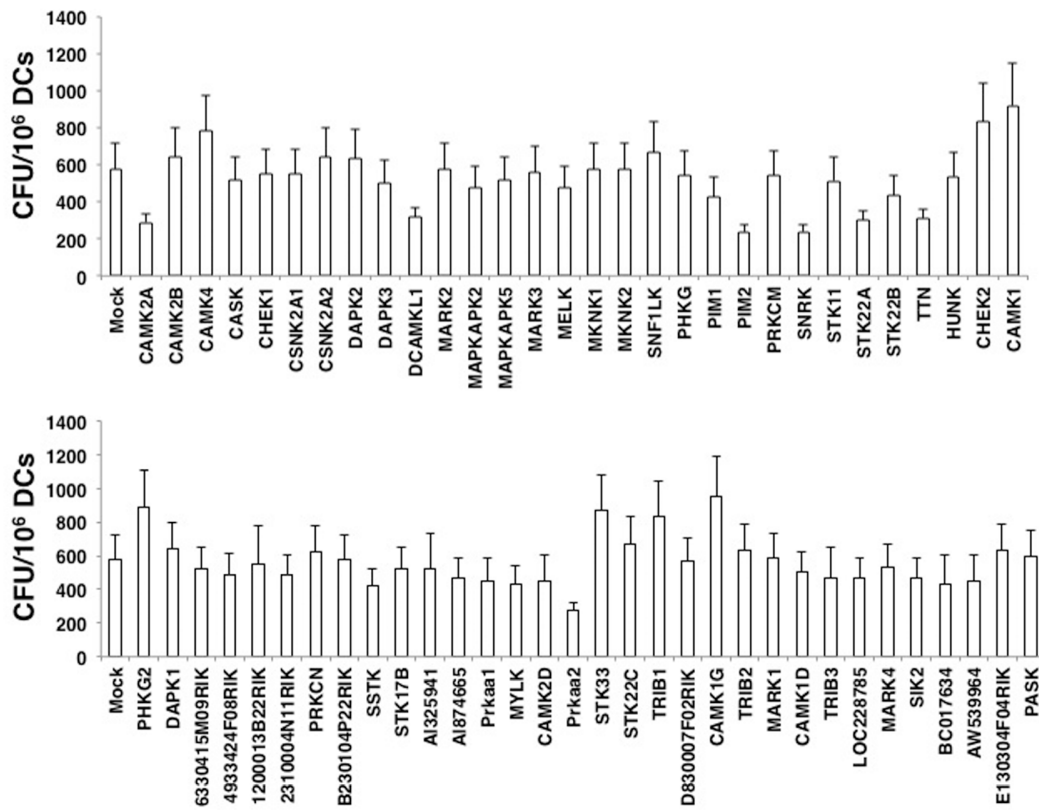

**Supplementary Figure 1.** Genes in the calcium-calmodulin pathway regulate survival of *M. tb* in mouse bone marrow differentiated DCs. DCs were transfected with siRNAs from library against the calcium-calmodulin pathway for 72h, followed by infection with 2.5 MOI *M. tb* H37Rv for 48h. Cell lysates were plated onto 7H11 agar plates, and CFU were monitored after 2-3 weeks. MOCK represents knockdown with a control siRNA. Data represent mean  $\pm$  S.D. of three independent experiments.

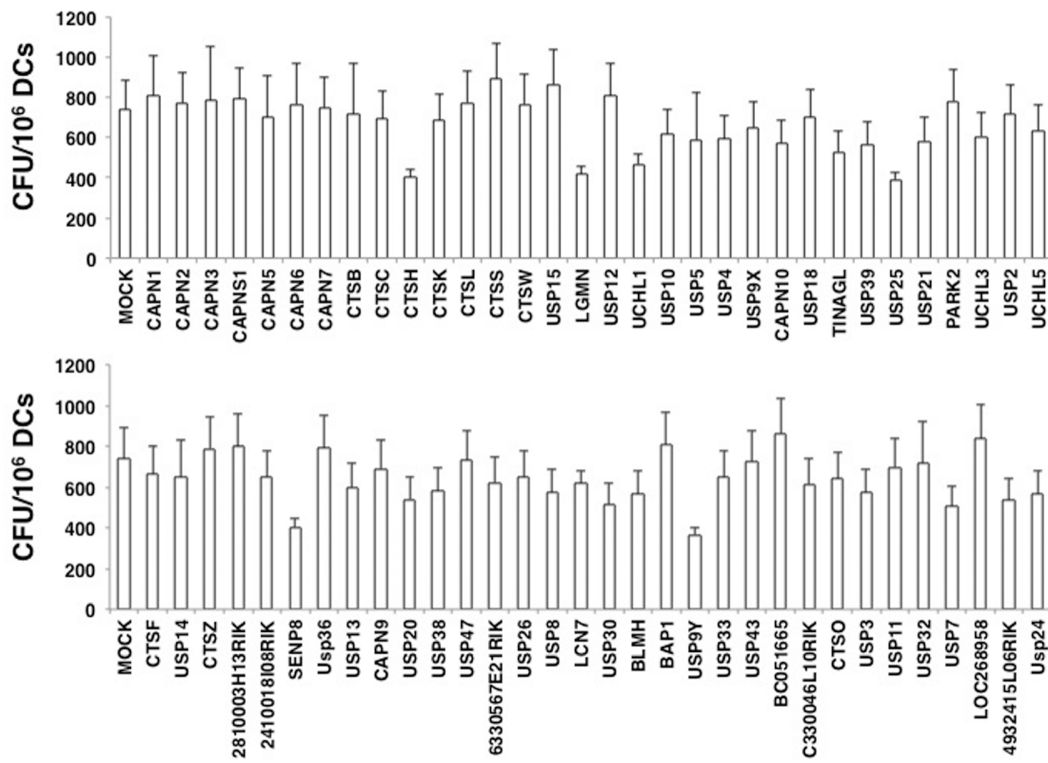

**Supplementary Figure 2.** Genes in the cysteine protease pathway regulate survival of *M. tb* in mouse bone marrow differentiated DCs. DCs were transfected with siRNAs from library against the cysteine protease pathway for 72h, followed by infection with 2.5 MOI *M. tb* H37Rv for 48h. Cell lysates were plated onto 7H11 agar plates, and CFU were monitored after 2-3 weeks. MOCK represents knockdown with a control siRNA. Data represent mean  $\pm$  S.D. of three independent experiments.

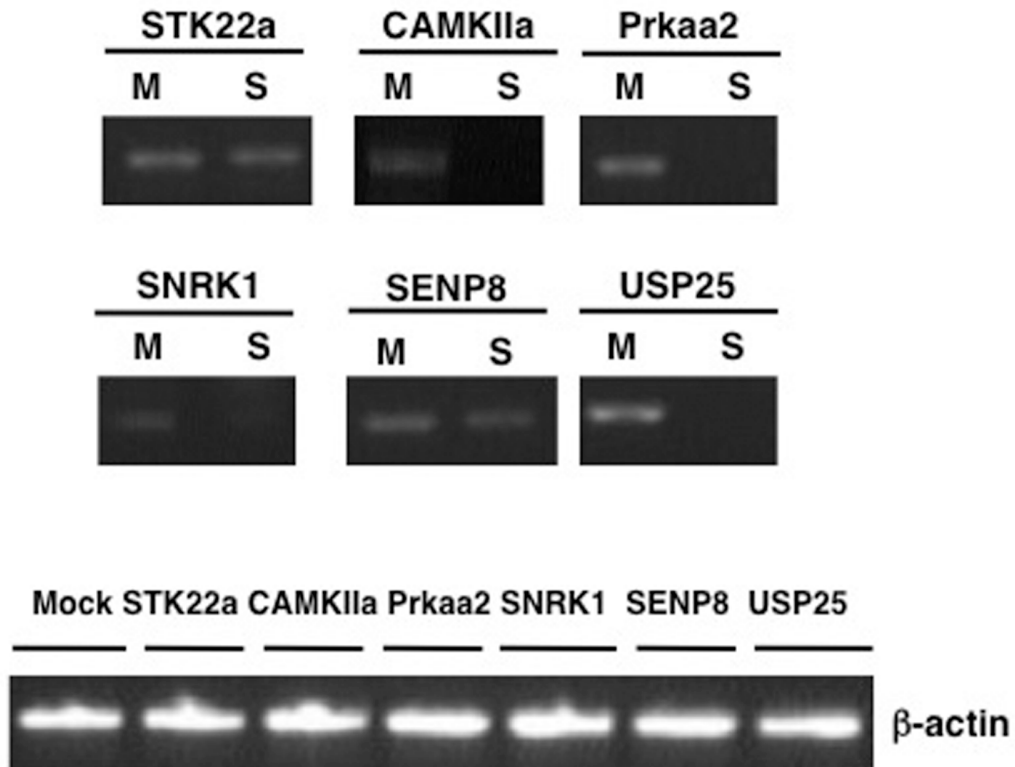

**Supplementary Figure 3.** Knockdown efficiency of mRNA following transfection with specific siRNAs. DCs were transfected with siRNAs against indicated genes for 72 h. Total RNA was enriched using Trizol (Qiagen). MOCK represents transfection with a control siRNA. Levels of the mRNA in mock and specific siRNA transfected DCs was quantified by semi-quantitative RT-PCR.

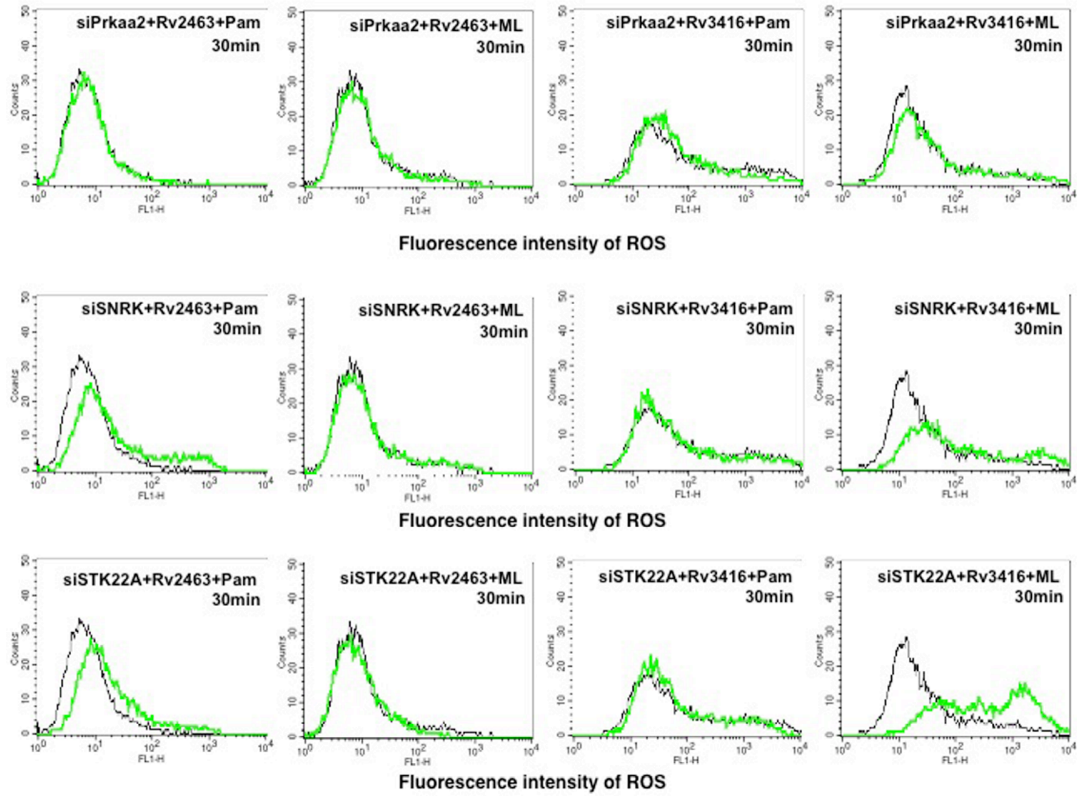

**Supplementary Figure 4.** Day1 and day5 antigens differentially regulate ROS generation in gene silenced DCs upon stimulation of TLR2 or DC-SIGNR1. DCs were transfected with siRNAs against indicated genes, followed by stimulation with either Rv2463 or Rv3416 along with either 1 $\mu$ g/ml Pam<sub>3</sub>csk<sub>4</sub> (Pam) or 5 $\mu$ g/ml manLAM (ML) for indicated times. 30 min prior to the incubation period, cells were loaded with 10 $\mu$ M DCFH-DA. At the end of the incubation period, cells were quickly and thoroughly washed with culture medium and immediately analyzed for ROS levels by flow cytometry. MOCK represents transfection with control siRNAs. Black lines depict ROS levels in DCs transfected with control siRNAs. Green lines depict DCs transfected with gene specific siRNAs. Data from one of two experiments are shown.
